# Supplementary material
Source: PubMed Central journal article supplement (PMC3735460)
Supplement: supp_djt153_jnci_JNCI_12_1619_s01.pdf [file supp_djt153_jnci_JNCI_12_1619_s01.pdf]

**Supplementary Table 1.** Altered metabolism in plasma and tumor associated with withaferin A (WA)

treatment in mouse mammary tumor virus-*neu* (MMTV-*neu*) mice

| Pathway                                                                                 | Plasma (Scaled intensity)<br>(Mean ± 95% CI) |            |            | Tumor (Scaled intensity)<br>(Mean ± 95% CI) |             |            |
|-----------------------------------------------------------------------------------------|----------------------------------------------|------------|------------|---------------------------------------------|-------------|------------|
|                                                                                         | Control*                                     | WA*        | <i>P</i> † | Control*                                    | WA*         | <i>P</i> † |
| <b><i>Carbohydrate_Aminosugars metabolism</i></b>                                       |                                              |            |            |                                             |             |            |
| <i>N</i> -Acetylglucosamine                                                             |                                              |            |            | .96 ± .21                                   | 1.07 ± .31  | .51        |
| <i>N</i> -Acetylglucosamine 6-phosphate                                                 |                                              |            |            | 1.00 ± .16                                  | .83 ± .27   | .24        |
| <i>N</i> -Acetylneuraminate                                                             |                                              |            |            | 1.04 ± .22                                  | .88 ± .41   | .42        |
| Erythronate                                                                             | .84 ± .15                                    | .99 ± .18  | .14        | 1.30 ± .56                                  | .89 ± .23   | .13        |
| Fucose                                                                                  | 1.03 ± .25                                   | .96 ± .19  | .60        | .93 ± .18                                   | 1.01 ± .23  | .52        |
| <b><i>Carbohydrate_Fructose, mannose, galactose, starch, and sucrose metabolism</i></b> |                                              |            |            |                                             |             |            |
| Fructose                                                                                | 1.13 ± .37                                   | .91 ± .24  | .26        | 1.14 ± .47                                  | .90 ± .32   | .34        |
| Galactose                                                                               |                                              |            |            | .93 ± .32                                   | 1.07 ± .46  | .56        |
| Lactose                                                                                 |                                              |            |            | 1.32 ± .81                                  | 1.17 ± 1.03 | .78        |
| Maltose                                                                                 |                                              |            |            | 1.37 ± .94                                  | .91 ± .72   | .38        |
| Mannitol                                                                                |                                              |            |            | 1.13 ± .37                                  | 1.00 ± .35  | .54        |
| Mannose                                                                                 | 1.08 ± .31                                   | 1.06 ± .27 | .91        | .91 ± .22                                   | 1.03 ± .26  | .42        |
| Mannose-6-phosphate                                                                     |                                              |            |            | 1.08 ± .18                                  | .90 ± .22   | .16        |
| 3-Sialyllactose                                                                         |                                              |            |            | 1.04 ± .55                                  | .97 ± .62   | .85        |
| Sorbitol                                                                                | 1.55 ± .50                                   | .79 ± .21  | .01        | 1.21 ± .25                                  | .92 ± .52   | .24        |
| Sucrose                                                                                 | 2.58 ± 1.56                                  | .89 ± .44  | .03        |                                             |             |            |
| <b><i>Carbohydrate_Glycolysis, gluconeogenesis, pyruvate metabolism</i></b>             |                                              |            |            |                                             |             |            |
| 1,5-Anhydroglucitol (1,5-AG)                                                            | 1.12 ± .12                                   | .91 ± .08  | .01        | 1.16 ± .26                                  | .88 ± .29   | .11        |
| 1,3-Dihydroxyacetone                                                                    | 1.59 ± .57                                   | .95 ± .14  | .02        | .95 ± .35                                   | 1.02 ± .21  | .69        |
| 3-Phosphoglycerate                                                                      | 1.43 ± .87                                   | 1.12 ± .60 | .50        | 1.31 ± .28                                  | .89 ± .24   | .02        |
| Glucose                                                                                 | 1.09 ± .13                                   | .91 ± .10  | .02        | 1.12 ± .60                                  | .90 ± .34   | .47        |
| Glycerate                                                                               | 1.14 ± .28                                   | .99 ± .10  | .24        | .91 ± .19                                   | 1.15 ± .25  | .09        |
| Lactate                                                                                 | 1.17 ± .19                                   | .86 ± .21  | .02        | 1.42 ± .30                                  | .84 ± .18   | .002       |
| Phosphoenolpyruvate (PEP)                                                               | 1.19 ± .75                                   | .80 ± .39  | .30        | 1.39 ± .28                                  | .87 ± .22   | .004       |
| Pyruvate                                                                                | 1.19 ± .35                                   | 1.03 ± .23 | .39        |                                             |             |            |
| Fructose-6-phosphate                                                                    |                                              |            |            | 1.04 ± .17                                  | .96 ± .25   | .53        |

|                                                                                                |             |              |       |            |             |     |
|------------------------------------------------------------------------------------------------|-------------|--------------|-------|------------|-------------|-----|
| Glucose-6-phosphate (G6P)                                                                      |             |              |       | 1.09 ± .18 | .90 ± .21   | .12 |
| Glucuronate                                                                                    |             |              |       | .90 ± .26  | 1.26 ± .42  | .11 |
| Isobar: fructose 1,6-diphosphate, glucose 1,6-diphosphate, myo-inositol 1,4 or 1,3-diphosphate |             |              |       | 1.32 ± .50 | .59 ± .37   | .01 |
| <b><i>Carbohydrate_Nucleotide sugars, pentose metabolism</i></b>                               |             |              |       |            |             |     |
| Arabinose                                                                                      | .82 ± .60   | .53 ± .37    | .35   |            |             |     |
| Arabitol                                                                                       | .99 ± .18   | 1.20 ± .56   | .40   | .91 ± .19  | 1.06 ± .29  | .34 |
| Isobar: ribulose 5-phosphate, xylulose 5-phosphate                                             | 1.30 ± .91  | .70 ± .40    | .17   | 1.13 ± .15 | .81 ± .21   | .01 |
| 6-Phosphogluconate                                                                             |             |              |       | .96 ± .43  | .91 ± .30   | .83 |
| Ribitol                                                                                        | 1.31 ± .29  | .86 ± .12    | .004  |            |             |     |
| Ribose                                                                                         | 1.23 ± .27  | .92 ± .17    | .04   | .83 ± .25  | .91 ± .24   | .59 |
| Ribulose                                                                                       | 1.17 ± .33  | .88 ± .13    | .08   | .90 ± .23  | .93 ± .25   | .85 |
| Sedoheptulose-7-phosphate                                                                      |             |              |       | .99 ± .19  | 1.02 ± .30  | .82 |
| Threitol                                                                                       | 1.01 ± .31  | .97 ± .26    | .84   |            |             |     |
| Xylitol                                                                                        | 1.58 ± .58  | .87 ± .13    | .01   | 1.22 ± .32 | .91 ± .27   | .10 |
| Xylonate                                                                                       | 1.04 ± .23  | .95 ± .24    | .56   | .96 ± .19  | 1.19 ± .40  | .25 |
| Xylulose                                                                                       |             |              |       | .78 ± .26  | .99 ± .27   | .20 |
| <b><i>Energy_Krebs cycle</i></b>                                                               |             |              |       |            |             |     |
| cis-Aconitate                                                                                  | 1.07 ± .19  | 1.06 ± .25   | .99   |            |             |     |
| Citrate                                                                                        | 1.19 ± .32  | .87 ± .11    | .0496 | 1.14 ± .28 | .82 ± .44   | .16 |
| Fumarate                                                                                       | 1.22 ± .27  | .95 ± .32    | .15   | 1.12 ± .11 | .81 ± .23   | .01 |
| alpha-Ketoglutarate                                                                            | .95 ± .47   | 1.29 ± .61   | .31   |            |             |     |
| Malate                                                                                         | 1.28 ± .39  | .95 ± .38    | .18   | 1.32 ± .69 | .76 ± .24   | .09 |
| Succinate                                                                                      | 1.35 ± .62  | .74 ± .33    | .06   | 1.14 ± .21 | 1.09 ± .24  | .74 |
| Succinylcarnitine                                                                              | 1.18 ± .23  | .96 ± .17    | .09   | 1.08 ± .25 | .97 ± .23   | .48 |
| <b><i>Energy_Oxidative phosphorylation</i></b>                                                 |             |              |       |            |             |     |
| Phosphate                                                                                      | 1.12 ± .22  | .99 ± .16    | .29   | .98 ± .08  | .96 ± .13   | .81 |
| <b><i>Lipid_Bile acid metabolism</i></b>                                                       |             |              |       |            |             |     |
| Cholate                                                                                        | 1.89 ± 2.59 | 1.65 ± 2.59  | .88   |            |             |     |
| Deoxycholate                                                                                   | 1.19 ± .51  | 1.08 ± .50   | .73   |            |             |     |
| Taurochenodeoxycholate                                                                         | .93 ± .27   | 6.47 ± 12.69 | .32   |            |             |     |
| Taurocholate                                                                                   | .98 ± .29   | 4.15 ± 7.46  | .33   | 1.21 ± .45 | 1.46 ± 1.23 | .65 |
| Taurodeoxycholate                                                                              | .98 ± .35   | 2.15 ± 2.63  | .31   |            |             |     |
| Tauro-beta-muricholate                                                                         |             |              |       | .78 ± .35  | 1.55 ± 1.59 | .28 |

|                                                       |             |               |       |            |            |     |
|-------------------------------------------------------|-------------|---------------|-------|------------|------------|-----|
| Tauroursodeoxycholate                                 | .84 ± .19   | 12.53 ± 26.72 | .32   |            |            |     |
| <b><i>Lipid_Carnitine metabolism</i></b>              |             |               |       |            |            |     |
| Acetylcarnitine                                       | .95 ± .12   | .98 ± .11     | .68   | 1.13 ± .24 | .94 ± .20  | .17 |
| Carnitine                                             | 1.09 ± .14  | .96 ± .16     | .17   | 1.02 ± .20 | 1.02 ± .22 | .97 |
| 3-Dehydrocarnitine                                    | 1.01 ± .10  | 1.05 ± .15    | .62   | .99 ± .25  | 1.05 ± .33 | .72 |
| Deoxycarnitine                                        | 1.13 ± .20  | .95 ± .30     | .25   | 1.10 ± .16 | .89 ± .23  | .09 |
| Hexanoylcarnitine                                     | 1.79 ± 1.36 | 1.31 ± .91    | .50   |            |            |     |
| Octanoylcarnitine                                     | 1.23 ± .66  | 1.09 ± .30    | .66   |            |            |     |
| Oleoylcarnitine                                       |             |               |       | 1.37 ± .60 | .95 ± .50  | .22 |
| Palmitoylcarnitine                                    | .87 ± .37   | 1.38 ± .68    | .15   | 1.56 ± .55 | .82 ± .50  | .03 |
| Stearoylcarnitine                                     | .86 ± .35   | 1.06 ± .32    | .32   | 1.43 ± .60 | .60 ± .44  | .02 |
| <b><i>Lipid_Diacylglycerol</i></b>                    |             |               |       |            |            |     |
| 1,2-Dipalmitoylglycerol                               | 1.18 ± .33  | 1.00 ± .36    | .39   | 1.10 ± .35 | 1.07 ± .28 | .90 |
| 1,3-Dipalmitoylglycerol                               | 1.35 ± .41  | .88 ± .32     | .0491 | 1.06 ± .26 | 1.09 ± .31 | .89 |
| <b><i>Lipid_Endocannabinoid</i></b>                   |             |               |       |            |            |     |
| Palmitoyl ethanolamide                                | .87 ± .25   | 1.13 ± .28    | .13   | 1.32 ± .53 | 1.14 ± .40 | .55 |
| <b><i>Lipid_Eicosanoid</i></b>                        |             |               |       |            |            |     |
| 12-HETE                                               | 1.68 ± .79  | .76 ± .44     | .03   | 1.54 ± .66 | .83 ± .32  | .04 |
| 6-Keto prostaglandin F1alpha                          |             |               |       | 1.41 ± .87 | 1.03 ± .37 | .36 |
| <b><i>Lipid_Essential fatty acid</i></b>              |             |               |       |            |            |     |
| Dihomo-linolenate (20:3n3 or n6)                      | 1.10 ± .28  | 1.05 ± .13    | .68   | 1.55 ± .64 | .80 ± .58  | .06 |
| Docosahexaenoate (DHA; 22:6n3)                        | 1.01 ± .14  | 1.04 ± .13    | .68   | 1.29 ± .49 | .93 ± .63  | .31 |
| Docosapentaenoate (n3 DPA; 22:5n3)                    | 1.03 ± .22  | 1.06 ± .16    | .74   | 1.46 ± .65 | .93 ± .73  | .22 |
| Docosapentaenoate (n6 DPA; 22:5n6)                    | 1.01 ± .11  | .90 ± .18     | .25   | 1.32 ± .63 | .94 ± .63  | .33 |
| Linoleate (18:2n6)                                    | .90 ± .16   | 1.21 ± .19    | .01   | 1.06 ± .51 | 1.15 ± .54 | .77 |
| Linolenate [alpha or gamma; (18:3n3 or 6)]            | .94 ± .26   | 1.16 ± .23    | .15   | 1.12 ± .62 | 1.19 ± .54 | .83 |
| <b><i>Lipid_Fatty acid, branched</i></b>              |             |               |       |            |            |     |
| Isopalmitic acid                                      |             |               |       | .73 ± .42  | 1.08 ± .37 | .16 |
| 13-Methylmyristic acid                                | .99 ± .15   | 1.02 ± .06    | .69   |            |            |     |
| 15-Methylpalmitate<br>(isobar with 2-methylpalmitate) | 1.01 ± .07  | 1.07 ± .11    | .26   |            |            |     |
| 17-Methylstearate                                     | .92 ± .20   | 1.17 ± .26    | .09   | 1.10 ± .48 | 1.01 ± .65 | .81 |
| <b><i>Lipid_Fatty acid, dicarboxylate</i></b>         |             |               |       |            |            |     |
| Azelate (nonanedioate)                                | 5.49 ± 4.50 | .75 ± .17     | .03   |            |            |     |

|                                                                  |             |            |     |             |             |     |
|------------------------------------------------------------------|-------------|------------|-----|-------------|-------------|-----|
| Docosadioate                                                     | 1.28 ± .70  | 1.00 ± .43 | .44 |             |             |     |
| Eicosanodioate                                                   | .93 ± .28   | 1.01 ± .21 | .64 |             |             |     |
| Hexadecanedioate                                                 | 1.10 ± .46  | 1.12 ± .38 | .92 |             |             |     |
| 2-Hydroxyglutarate                                               | 1.10 ± .32  | 1.02 ± .20 | .64 |             |             |     |
| Sebacate (decanedioate)                                          | 1.91 ± 1.06 | .90 ± .21  | .04 |             |             |     |
| Suberate (octanedioate)                                          | 1.77 ± 1.10 | .75 ± .38  | .06 |             |             |     |
| Tetradecanedioate                                                | 1.13 ± .29  | .97 ± .21  | .29 |             |             |     |
| Undecanedioate                                                   | 1.22 ± .27  | .91 ± .13  | .03 |             |             |     |
| <b><i>Lipid_Fatty acid, monohydroxy</i></b>                      |             |            |     |             |             |     |
| 13-HODE + 9-HODE                                                 | 1.29 ± .62  | .96 ± .29  | .26 | .87 ± .53   | 1.40 ± .72  | .19 |
| 2-Hydroxyoctanoate                                               | .93 ± .28   | .90 ± .39  | .89 |             |             |     |
| 2-Hydroxypalmitate                                               | .92 ± .14   | 1.05 ± .14 | .14 | .96 ± .33   | 1.07 ± .33  | .58 |
| 2-Hydroxystearate                                                | .98 ± .33   | 1.26 ± .33 | .19 |             |             |     |
| 3-Hydroxyoctanoate                                               | 1.02 ± .18  | 1.15 ± .29 | .38 |             |             |     |
| 3-Hydroxydecanoate                                               |             |            |     | 1.74 ± 2.07 | 2.49 ± 2.92 | .63 |
| 4-Hydroxybutyrate (GHB)                                          | 1.22 ± .71  | 1.14 ± .42 | .83 | 1.10 ± .32  | .91 ± .20   | .23 |
| <b><i>Lipid_Fatty acid metabolism (also BCAA metabolism)</i></b> |             |            |     |             |             |     |
| Butyrylcarnitine                                                 | 1.38 ± .65  | 1.11 ± .49 | .45 | .97 ± .32   | .92 ± .27   | .74 |
| Butyrylglycine                                                   | 1.12 ± .60  | 1.07 ± .47 | .87 |             |             |     |
| Propionylcarnitine                                               | 1.29 ± .49  | .90 ± .19  | .10 | 1.12 ± .22  | .78 ± .18   | .01 |
| <b><i>Lipid_Fatty acid metabolism</i></b>                        |             |            |     |             |             |     |
| Hexanoylglycine                                                  | .88 ± .39   | 1.06 ± .26 | .40 |             |             |     |
| Isovalerate                                                      | 1.11 ± .39  | 1.03 ± .26 | .68 |             |             |     |
| Valerylcarnitine                                                 | 1.84 ± 1.06 | .89 ± .35  | .06 |             |             |     |
| Valerylglycine                                                   | 1.24 ± .78  | .90 ± .26  | .34 |             |             |     |
| <b><i>Lipid_Glycerolipid metabolism</i></b>                      |             |            |     |             |             |     |
| Choline                                                          | 1.08 ± .17  | 1.02 ± .09 | .51 | .94 ± .12   | 1.11 ± .09  | .02 |
| Choline phosphate                                                |             |            |     | 1.17 ± .61  | 1.16 ± .39  | .98 |
| Ethanolamine                                                     |             |            |     | .74 ± .26   | 1.21 ± .35  | .02 |
| Glycerol                                                         | .95 ± .11   | 1.06 ± .23 | .33 | 1.02 ± .22  | 1.27 ± .28  | .12 |
| Glycerol 3-phosphate (G3P)                                       | 1.21 ± .29  | .83 ± .15  | .02 | .95 ± .34   | 1.12 ± .33  | .42 |
| Glycerophosphoethanolamine                                       |             |            |     | 1.07 ± .64  | 1.08 ± .45  | .97 |
| Glycerophosphorylcholine (GPC)                                   | 1.02 ± .30  | .99 ± .24  | .86 | .86 ± .25   | 1.01 ± .15  | .23 |

|                                             |            |            |     |            |            |       |
|---------------------------------------------|------------|------------|-----|------------|------------|-------|
| Phosphoethanolamine                         |            |            |     | 1.00 ± .08 | 1.01 ± .20 | .86   |
| <b><i>Lipid_Inositol metabolism</i></b>     |            |            |     |            |            |       |
| Chiro-inositol                              |            |            |     | 1.29 ± .97 | .65 ± .21  | .15   |
| Inositol 1-phosphate (IIP)                  | .87 ± .16  | 1.12 ± .19 | .03 | .96 ± .14  | 1.19 ± .29 | .12   |
| Myo-inositol                                | 1.17 ± .34 | .74 ± .22  | .02 | 1.33 ± .51 | .91 ± .23  | .10   |
| Scyllo-inositol                             |            |            |     | 1.34 ± .74 | 1.16 ± .54 | .65   |
| <b><i>Lipid_Ketone bodies</i></b>           |            |            |     |            |            |       |
| 3-Hydroxybutyrate (BHBA)                    | .84 ± .58  | 1.18 ± .58 | .35 | 1.13 ± .68 | 1.10 ± .39 | .94   |
| <b><i>Lipid_Long chain fatty acid</i></b>   |            |            |     |            |            |       |
| Adrenate (22:4n6)                           | 1.09 ± .28 | 1.03 ± .15 | .70 | 1.24 ± .41 | .87 ± .53  | .23   |
| Arachidonate (20:4n6)                       | 1.07 ± .13 | .95 ± .14  | .18 | 1.04 ± .26 | .75 ± .33  | .13   |
| Dihomo-linoleate (20:2n6)                   | .92 ± .23  | 1.13 ± .19 | .11 | 1.36 ± .43 | .88 ± .69  | .18   |
| Docosadienoate (22:2n6)                     | .96 ± .10  | 1.10 ± .21 | .18 | 1.55 ± .67 | .92 ± .83  | .19   |
| Docosatrienoate (22:3n3)                    |            |            |     | 1.71 ± .71 | .82 ± .67  | .0488 |
| Eicosenoate (20:1n9 or 11)                  | .86 ± .18  | 1.32 ± .30 | .01 | 1.16 ± .34 | .83 ± .44  | .18   |
| 10-Heptadecenoate (17:1n7)                  | .94 ± .29  | 1.25 ± .26 | .09 | 1.13 ± .53 | 1.07 ± .54 | .85   |
| Margarate (17:0)                            | .92 ± .16  | 1.05 ± .13 | .16 | 1.16 ± .41 | 1.07 ± .49 | .74   |
| Mead acid (20:3n9)                          | 1.02 ± .18 | 1.02 ± .33 | .98 |            |            |       |
| Myristate (14:0)                            | .88 ± .19  | 1.24 ± .20 | .01 | 1.24 ± .47 | 1.27 ± .57 | .92   |
| Myristoleate (14:1n5)                       | .75 ± .28  | 1.17 ± .25 | .02 | .96 ± .42  | 1.14 ± .48 | .50   |
| Nonadecanoate (19:0)                        | .96 ± .16  | 1.10 ± .17 | .16 | 1.04 ± .38 | 1.07 ± .50 | .92   |
| 10-Nonadecenoate (19:1n9)                   | .90 ± .29  | 1.35 ± .36 | .04 | 1.23 ± .53 | 1.20 ± .72 | .95   |
| Oleate (18:1n9)                             | .81 ± .34  | 1.27 ± .28 | .03 | .97 ± .44  | 1.38 ± .57 | .20   |
| Palmitate (16:0)                            | .88 ± .13  | 1.04 ± .08 | .03 | 1.04 ± .33 | 1.10 ± .41 | .80   |
| Palmitoleate (16:1n7)                       | .75 ± .29  | 1.24 ± .27 | .01 | 1.18 ± .63 | 1.23 ± .62 | .90   |
| Pentadecanoate (15:0)                       | .99 ± .14  | 1.02 ± .14 | .76 |            |            |       |
| Stearate (18:0)                             | .89 ± .11  | 1.07 ± .09 | .01 | 1.03 ± .18 | 1.02 ± .31 | .96   |
| Stearidonate (18:4n3)                       | .96 ± .35  | 1.22 ± .44 | .30 |            |            |       |
| <i>cis</i> -Vaccenate (18:1n7)              | 1.00 ± .12 | 1.17 ± .37 | .34 | 1.03 ± .28 | 1.03 ± .34 | 1.00  |
| <b><i>Lipid_Medium chain fatty acid</i></b> |            |            |     |            |            |       |
| Caprate (10:0)                              | .73 ± .25  | 1.56 ± .54 | .01 | .98 ± .09  | .98 ± .24  | .99   |
| Caproate (6:0)                              | .83 ± .16  | 1.20 ± .23 | .01 | .71 ± .32  | 1.19 ± .54 | .09   |
| Caprylate (8:0)                             | .71 ± .23  | 1.57 ± .58 | .01 | .94 ± .22  | 1.05 ± .34 | .54   |

|                                              |             |             |      |             |             |       |
|----------------------------------------------|-------------|-------------|------|-------------|-------------|-------|
| 5-Dodecenoate (12:1n7)                       | .76 ± .24   | 1.35 ± .29  | .003 |             |             |       |
| Heptanoate (7:0)                             | .77 ± .12   | 1.49 ± .51  | .01  | 1.90 ± 2.16 | 1.80 ± 1.59 | .93   |
| Laurate (12:0)                               | .74 ± .19   | 1.17 ± .18  | .002 | 1.04 ± .11  | 1.00 ± .24  | .75   |
| Pelargonate (9:0)                            | .69 ± .23   | 1.59 ± .60  | .01  | .96 ± .12   | .98 ± .26   | .93   |
| Undecanoate (11:0)                           | .73 ± .21   | 1.34 ± .35  | .003 | 1.00 ± .23  | 1.05 ± .22  | .74   |
| 10-Undecenoate (11:1n1)                      | .78 ± .33   | 1.05 ± .47  | .29  |             |             |       |
| <b><i>Lipid_Short chain fatty acid</i></b>   |             |             |      |             |             |       |
| Valerate                                     | .86 ± .29   | .94 ± .37   | .72  |             |             |       |
| <b><i>Lipid_Lysolipid</i></b>                |             |             |      |             |             |       |
| 1-Arachidonoylglycerophosphocholine          | 1.11 ± .26  | 1.07 ± .35  | .85  | .98 ± .48   | .74 ± .43   | .40   |
| 2-Arachidonoylglycerophosphocholine          | 1.38 ± .93  | 1.44 ± .99  | .91  | 1.17 ± .58  | .72 ± .43   | .17   |
| 1-Arachidonoylglycerophosphoethanolamine     | 1.01 ± .31  | 1.03 ± .19  | .86  | 1.09 ± .35  | 1.19 ± .42  | .66   |
| 2-Arachidonoylglycerophosphoethanolamine     | 1.23 ± .49  | 1.16 ± .30  | .77  | 1.15 ± .41  | 1.07 ± .43  | .75   |
| 1-Arachidonoylglycerophosphoinositol         | 1.06 ± .28  | 1.07 ± .20  | .93  | 1.18 ± .33  | .94 ± .57   | .41   |
| 1-Arachidoylglycerophosphocholine            | 1.30 ± 1.12 | 1.02 ± .37  | .57  |             |             |       |
| 1-Docosahexaenoylglycerophosphocholine       | 1.08 ± .42  | 1.17 ± .62  | .78  | 1.44 ± .77  | .67 ± .33   | .0462 |
| 2-Docosahexaenoylglycerophosphocholine       | 1.63 ± 1.37 | 1.73 ± 1.42 | .90  | 1.56 ± .87  | .87 ± .80   | .19   |
| 2-Docosahexaenoylglycerophosphoethanolamine  | 1.34 ± .93  | 1.47 ± 1.08 | .84  | 1.10 ± .40  | .88 ± .53   | .45   |
| 1-Docosapentaenoylglycerophosphocholine      | 1.42 ± 1.10 | 1.16 ± .62  | .62  |             |             |       |
| 2-Docosapentaenoylglycerophosphoethanolamine |             |             |      | 1.15 ± .51  | .84 ± .52   | .34   |
| 1-Eicosadienoylglycerophosphocholine         | 1.47 ± 1.37 | 1.15 ± .59  | .62  | 1.52 ± .87  | .78 ± .52   | .11   |
| 1-Eicosatrienoylglycerophosphocholine        | 1.35 ± .94  | 1.37 ± .83  | .97  | 1.82 ± 1.31 | .77 ± .37   | .09   |
| 2-Eicosatrienoylglycerophosphocholine        |             |             |      | 1.65 ± .98  | .66 ± .27   | .04   |
| 1-Heptadecanoylglycerophosphocholine         | 1.45 ± 1.21 | 1.21 ± .82  | .70  | 1.13 ± .55  | .81 ± .28   | .25   |
| 1-Linoleoylglycerophosphocholine             | 1.01 ± .25  | 1.00 ± .28  | 1.00 | 1.19 ± .52  | .72 ± .48   | .14   |
| 2-Linoleoylglycerophosphocholine             | 1.04 ± .42  | 1.04 ± .32  | .98  | 1.16 ± .52  | .73 ± .55   | .20   |
| 1-Linoleoylglycerophosphoethanolamine        | 1.03 ± .30  | 1.01 ± .34  | .93  | .93 ± .38   | 1.05 ± .60  | .71   |
| 2-Linoleoylglycerophosphoethanolamine        | 1.05 ± .40  | 1.01 ± .35  | .86  | 1.11 ± .62  | 1.26 ± .61  | .70   |
| 1-Myristoylglycerophosphocholine             | 2.41 ± 2.17 | 1.25 ± .61  | .25  | 1.57 ± 1.15 | .91 ± .55   | .24   |
| 2-Myristoylglycerophosphocholine             | 1.69 ± 1.40 | 1.15 ± .51  | .41  | 1.14 ± .33  | .66 ± .29   | .02   |
| 1-Oleoylglycerophosphocholine                | 1.65 ± 1.75 | 1.75 ± 1.64 | .92  | 1.55 ± 1.20 | 1.05 ± .67  | .41   |
| 2-Oleoylglycerophosphocholine                | 1.66 ± 1.48 | 1.73 ± 1.25 | .93  | 1.49 ± .95  | .88 ± .50   | .20   |
| 1-Oleoylglycerophosphoethanolamine           | 1.01 ± .23  | 1.00 ± .27  | .94  | 1.10 ± .45  | 1.00 ± .44  | .73   |
| 2-Oleoylglycerophosphoethanolamine           | .97 ± .22   | .92 ± .27   | .70  | 1.22 ± .50  | 1.04 ± .41  | .52   |
| 1-Oleoylglycerophosphoinositol               |             |             |      | .83 ± .28   | .74 ± .35   | .64   |

|                                          |             |             |     |             |             |     |
|------------------------------------------|-------------|-------------|-----|-------------|-------------|-----|
| 1-Oleoylglycerophosphoserine             |             |             |     | 1.27 ± .67  | 1.24 ± .72  | .94 |
| 1-Palmitoleoylglycerophosphocholine      | 1.31 ± .74  | 1.17 ± .60  | .73 | 1.14 ± .59  | .80 ± .42   | .29 |
| 2-Palmitoleoylglycerophosphocholine      | 1.40 ± .99  | 1.82 ± 1.21 | .54 | 1.25 ± .54  | .76 ± .44   | .12 |
| 1-Palmitoleoylglycerophosphoethanolamine |             |             |     | 1.08 ± .50  | 1.14 ± .34  | .81 |
| 2-Palmitoleoylglycerophosphoethanolamine |             |             |     | 1.23 ± .57  | .93 ± .66   | .42 |
| 1-Palmitoylglycerophosphocholine         | 1.31 ± .86  | 1.43 ± .96  | .83 | 1.25 ± .68  | .88 ± .52   | .33 |
| 2-Palmitoylglycerophosphocholine         | 1.12 ± .57  | 1.06 ± .46  | .85 | 1.14 ± .38  | .72 ± .43   | .11 |
| 1-Palmitoylglycerophosphoethanolamine    | 1.01 ± .22  | .94 ± .23   | .61 | .98 ± .31   | .93 ± .39   | .85 |
| 2-Palmitoylglycerophosphoethanolamine    | 1.23 ± .54  | 1.03 ± .35  | .48 | 1.05 ± .31  | .83 ± .56   | .43 |
| 1-Palmitoylglycerophosphoinositol        | 1.03 ± .17  | .92 ± .20   | .33 | 1.11 ± .29  | 1.24 ± .69  | .68 |
| 1-Palmitoylplasménylethanolamine         | 1.11 ± .19  | .95 ± .14   | .12 | 1.04 ± .28  | .87 ± .37   | .38 |
| 1-Pentadecanoylglycerophosphocholine     | 1.21 ± .35  | 1.04 ± .39  | .47 |             |             |     |
| 1-Stearoylglycerophosphocholine          | 1.25 ± .74  | 1.28 ± .61  | .94 | 1.13 ± .48  | .83 ± .44   | .29 |
| 2-Stearoylglycerophosphocholine          | 1.47 ± 1.59 | 1.58 ± 1.29 | .91 | 1.41 ± .75  | .92 ± .49   | .22 |
| 1-Stearoylglycerophosphoethanolamine     | .94 ± .14   | 1.04 ± .22  | .41 | 1.03 ± .33  | 1.07 ± .46  | .89 |
| 1-Stearoylglycerophosphoinositol         | .77 ± .20   | 1.14 ± .23  | .01 | 1.22 ± .52  | 1.37 ± .85  | .71 |
| <b><i>Lipid_Monoacylglycerol</i></b>     |             |             |     |             |             |     |
| 1-Linoleoylglycerol (1-monolinolein)     | .95 ± .26   | 1.31 ± .71  | .27 | 1.36 ± 1.66 | 1.41 ± 1.11 | .96 |
| 2-Linoleoylglycerol (2-monolinolein)     |             |             |     | .82 ± .32   | .89 ± .32   | .71 |
| 1-Oleoylglycerol (1-monoolein)           | .97 ± .25   | 1.15 ± .44  | .43 |             |             |     |
| 2-Oleoylglycerol (2-monoolein)           |             |             |     | .81 ± .24   | .88 ± .28   | .65 |
| 1-Palmitoylglycerol (1-monopalmitin)     |             |             |     | 1.07 ± .37  | 1.09 ± .40  | .94 |
| 2-Palmitoylglycerol (2-monopalmitin)     |             |             |     | 1.33 ± .57  | .99 ± .33   | .25 |
| <b><i>Lipid_Sphingolipid</i></b>         |             |             |     |             |             |     |
| Palmitoyl sphingomyelin                  | 1.08 ± .18  | 1.05 ± .19  | .84 | 1.01 ± .18  | .98 ± .24   | .84 |
| Sphinganine                              |             |             |     | 1.05 ± .28  | .68 ± .33   | .07 |
| Sphingosine                              | 1.08 ± .25  | .84 ± .24   | .13 | 1.04 ± .30  | .75 ± .41   | .20 |
| Stearoyl sphingomyelin                   | 1.09 ± .36  | 1.35 ± .56  | .37 | 1.00 ± .33  | 1.12 ± .31  | .56 |
| <b><i>Lipid_Sterol/Steroid</i></b>       |             |             |     |             |             |     |
| Campesterol                              | 1.00 ± .22  | 1.03 ± .31  | .85 | 1.13 ± .18  | .92 ± .40   | .27 |
| Cholesterol                              | 1.05 ± .12  | 1.01 ± .14  | .64 | 1.08 ± .11  | .88 ± .16   | .03 |
| Corticosterone                           | 1.38 ± .89  | 1.63 ± .95  | .67 |             |             |     |
| 7-alpha-Hydroxycholesterol               |             |             |     | .78 ± .60   | 2.20 ± 1.93 | .12 |

|                                                                               |             |            |     |             |             |       |
|-------------------------------------------------------------------------------|-------------|------------|-----|-------------|-------------|-------|
| 7-beta-Hydroxycholesterol                                                     | .80 ± .22   | .95 ± .35  | .39 | 1.02 ± .52  | 2.07 ± 1.36 | .11   |
| 7-alpha-Hydroxy-3-oxo-4-cholestenoate (7-Hoca)                                | .95 ± .22   | 1.15 ± .30 | .22 |             |             |       |
| beta-Sitosterol                                                               | .85 ± .27   | 1.05 ± .42 | .35 | 1.00 ± .15  | .92 ± .32   | .58   |
| <b><i>Nucleotide_Purine metabolism, adenine containing</i></b>                |             |            |     |             |             |       |
| Adenine                                                                       |             |            |     | 1.21 ± .27  | .91 ± .27   | .08   |
| Adenosine                                                                     |             |            |     | 1.38 ± .57  | 1.11 ± .59  | .46   |
| Adenosine 2'-monophosphate (2'-AMP)                                           |             |            |     | 1.54 ± .79  | .67 ± .53   | .0465 |
| Adenosine 3'-monophosphate (3'-AMP)                                           |             |            |     | 1.40 ± .88  | .87 ± .45   | .22   |
| Adenosine 5'-monophosphate (AMP)                                              | 1.35 ± 1.04 | .13 ± .01  | .02 | 1.65 ± 1.27 | 3.86 ± 6.32 | .43   |
| 2'-Deoxyadenosine 3'-monophosphate                                            |             |            |     | 1.19 ± .47  | 1.70 ± .97  | .28   |
| N1-Methyladenosine                                                            | 1.01 ± .16  | 1.02 ± .21 | .88 | .98 ± .15   | .92 ± .22   | .62   |
| <b><i>Nucleotide_Purine metabolism, guanine containing</i></b>                |             |            |     |             |             |       |
| N6-Carbamoylthreonyladenosine                                                 | .99 ± .21   | .90 ± .26  | .55 | .84 ± .26   | 1.02 ± .25  | .26   |
| 2'-Deoxyguanosine                                                             |             |            |     | .78 ± .30   | 1.53 ± .83  | .07   |
| Guanosine                                                                     |             |            |     | .96 ± .48   | 1.01 ± .36  | .85   |
| Guanosine 5'- monophosphate (5'-GMP)                                          |             |            |     | 1.22 ± .97  | 2.10 ± 2.48 | .45   |
| 7-Methylguanine                                                               | 1.12 ± .43  | 1.07 ± .34 | .84 |             |             |       |
| N1-Methylguanosine                                                            | 1.05 ± .13  | .94 ± .13  | .15 | .92 ± .16   | .92 ± .18   | .93   |
| <b><i>Nucleotide_Pyrimidine metabolism, cytidine containing</i></b>           |             |            |     |             |             |       |
| N4-Acetylcytidine                                                             | 1.03 ± .11  | .99 ± .15  | .65 |             |             |       |
| Cytidine                                                                      | 1.04 ± .13  | .95 ± .07  | .20 | 1.12 ± .23  | .97 ± .36   | .44   |
| Cytidine-3'-monophosphate (3'-CMP)                                            |             |            |     | 1.97 ± 1.61 | .83 ± .21   | .12   |
| Cytidine 5'-monophosphate (5'-CMP)                                            |             |            |     | .99 ± .26   | .95 ± .25   | .80   |
| 2'-Deoxycytidine                                                              | .98 ± .13   | 1.00 ± .18 | .86 | 1.08 ± .21  | 1.12 ± .35  | .82   |
| 2'-Deoxycytidine 5'-monophosphate                                             |             |            |     | 1.07 ± .29  | .97 ± .30   | .57   |
| 5-Methyl-2'-deoxycytidine                                                     | 1.19 ± .19  | .92 ± .06  | .01 |             |             |       |
| <b><i>Nucleotide_Pyrimidine metabolism, orotate containing</i></b>            |             |            |     |             |             |       |
| Orotate                                                                       | 1.48 ± .44  | .91 ± .11  | .01 | 1.05 ± .12  | .82 ± .28   | .10   |
| <b><i>Nucleotide_Pyrimidine metabolism, thymine containing</i></b>            |             |            |     |             |             |       |
| Thymidine                                                                     | 1.12 ± .22  | .98 ± .11  | .20 | 1.04 ± .24  | 1.13 ± .31  | .60   |
| Thymine                                                                       |             |            |     | 1.31 ± .60  | .99 ± .34   | .28   |
| <b><i>Nucleotide_Purine metabolism, (hypo)xanthine/inosine containing</i></b> |             |            |     |             |             |       |
| 2'-Deoxyinosine                                                               |             |            |     | .90 ± .32   | 1.61 ± .92  | .11   |



|                                                                        |             |            |     |            |             |      |
|------------------------------------------------------------------------|-------------|------------|-----|------------|-------------|------|
| Hypoxanthine                                                           | 1.43 ± .43  | .86 ± .15  | .01 | .98 ± .42  | .87 ± .42   | .67  |
| Inosine                                                                | 1.93 ± 1.76 | .89 ± .27  | .19 | .90 ± .38  | .90 ± .39   | 1.00 |
| Inosine 5'-monophosphate (IMP)                                         |             |            |     | .99 ± 1.34 | 1.94 ± 2.46 | .44  |
| Xanthine                                                               | 6.13 ± 9.62 | .94 ± .20  | .22 | 1.07 ± .16 | .95 ± .15   | .21  |
| Xanthosine                                                             | 1.78 ± 1.62 | .90 ± .55  | .25 | 1.11 ± .38 | .99 ± .36   | .61  |
| <b><i>Nucleotide_Pyrimidine metabolism, uracil containing</i></b>      |             |            |     |            |             |      |
| 2'-Deoxyuridine                                                        | 1.03 ± .21  | 1.00 ± .24 | .82 |            |             |      |
| 5,6-Dihydrouracil                                                      | 1.43 ± .48  | .98 ± .17  | .05 | 1.33 ± .87 | 1.10 ± .68  | .62  |
| 5-Methyluridine (ribothymidine)                                        |             |            |     | 1.28 ± .67 | .99 ± .14   | .33  |
| Pseudouridine                                                          | .90 ± .17   | .97 ± .21  | .56 | .94 ± .13  | .90 ± .28   | .76  |
| Uracil                                                                 | 1.43 ± .48  | .85 ± .17  | .02 | 1.18 ± .25 | .96 ± .26   | .17  |
| Uridine                                                                | 1.27 ± .40  | .91 ± .18  | .07 | 1.11 ± .28 | 1.05 ± .30  | .73  |
| Uridine monophosphate (5' or 3')                                       |             |            |     | .81 ± .73  | 1.62 ± 1.91 | .37  |
| <b><i>Nucleotide_Purine metabolism, urate metabolism</i></b>           |             |            |     |            |             |      |
| Allantoin                                                              | 1.08 ± .30  | .84 ± .28  | .19 | 1.20 ± .32 | .83 ± .31   | .07  |
| Urate                                                                  | 1.07 ± .30  | .88 ± .22  | .25 | 1.01 ± .31 | 1.01 ± .33  | 1.00 |
| <b><i>Nucleotide_Purine and pyrimidine metabolism</i></b>              |             |            |     |            |             |      |
| Methylphosphate                                                        |             |            |     | 1.04 ± .25 | 1.27 ± .44  | .32  |
| <b><i>Amino acid_Alanine and aspartate metabolism</i></b>              |             |            |     |            |             |      |
| N-Acetylalanine                                                        | 1.06 ± .16  | .98 ± .19  | .49 | 1.08 ± .25 | .97 ± .20   | .41  |
| N-Acetyl-beta-alanine                                                  | 1.12 ± .22  | 1.00 ± .18 | .32 |            |             |      |
| N-Acetylaspartate (NAA)                                                | 1.23 ± .31  | .93 ± .16  | .07 | .90 ± .32  | .99 ± .23   | .59  |
| Alanine                                                                | 1.42 ± .40  | .94 ± .16  | .02 | 1.06 ± .20 | .96 ± .18   | .41  |
| beta-Alanine                                                           |             |            |     | 1.04 ± .24 | 1.01 ± .23  | .88  |
| Asparagine                                                             | 1.12 ± .26  | .92 ± .11  | .12 | .98 ± .21  | .93 ± .25   | .71  |
| Aspartate                                                              | 1.27 ± .30  | .94 ± .15  | .04 | 1.03 ± .37 | 1.00 ± .22  | .89  |
| 3-Ureidopropionate                                                     | 1.42 ± .50  | 1.06 ± .44 | .23 | 1.29 ± .37 | 1.17 ± .73  | .72  |
| <b><i>Amino acid_Butanoate metabolism</i></b>                          |             |            |     |            |             |      |
| 2-Aminobutyrate                                                        | 1.06 ± .21  | .98 ± .15  | .46 | 1.01 ± .39 | .91 ± .38   | .70  |
| <b><i>Amino acid_Creatine metabolism</i></b>                           |             |            |     |            |             |      |
| Creatine                                                               | 1.21 ± .30  | 1.12 ± .33 | .61 | 1.14 ± .37 | .95 ± .23   | .33  |
| Creatinine                                                             | 1.07 ± .29  | .94 ± .31  | .48 | 1.31 ± .49 | 1.11 ± .39  | .46  |
| <b><i>Amino acid_Cysteine, methionine, SAM, taurine metabolism</i></b> |             |            |     |            |             |      |

|                                                                   |             |            |     |             |            |     |
|-------------------------------------------------------------------|-------------|------------|-----|-------------|------------|-----|
| <i>N</i> -Acetylmethionine                                        | 1.15 ± .45  | .80 ± .26  | .14 | 1.11 ± .31  | 1.10 ± .26 | .97 |
| <i>S</i> -Adenosylhomocysteine                                    | 3.33 ± 2.29 | 1.02 ± .41 | .03 | .92 ± .25   | 1.03 ± .27 | .50 |
| Cysteine                                                          |             |            |     | 1.19 ± .47  | .86 ± .24  | .16 |
| Cystine                                                           |             |            |     | .94 ± .43   | 1.28 ± .53 | .25 |
| <i>N</i> -Formylmethionine                                        | 1.18 ± .21  | .96 ± .11  | .05 | 1.03 ± .21  | .94 ± .37  | .63 |
| Homocysteine                                                      |             |            |     | 1.70 ± .93  | .88 ± .27  | .07 |
| 2-Hydroxybutyrate (AHB)                                           | 1.12 ± .44  | .87 ± .33  | .31 | 1.19 ± .36  | .96 ± .51  | .38 |
| Hypotaurine                                                       |             |            |     | 1.01 ± .26  | 1.00 ± .30 | .94 |
| Methionine                                                        | 1.27 ± .50  | .89 ± .31  | .15 | 1.12 ± .22  | .95 ± .16  | .17 |
| Methionine sulfoxide                                              |             |            |     | 1.18 ± .31  | 1.03 ± .33 | .44 |
| Taurine                                                           | 1.26 ± .35  | .93 ± .34  | .13 | 1.30 ± .49  | 1.01 ± .48 | .33 |
| <b><i>Amino acid_Glutamate metabolism</i></b>                     |             |            |     |             |            |     |
| <i>N</i> -Acetyl-aspartyl-glutamate (NAAG)                        |             |            |     | .93 ± .42   | 1.00 ± .46 | .81 |
| <i>N</i> -Acetylglutamate                                         |             |            |     | .89 ± .19   | 1.01 ± .25 | .40 |
| gamma-Aminobutyrate (GABA)                                        |             |            |     | 3.14 ± 3.69 | 1.00 ± .28 | .19 |
| Glutamate                                                         | 1.20 ± .27  | .88 ± .18  | .04 | .95 ± .16   | 1.13 ± .15 | .08 |
| Glutamate, gamma-methyl ester                                     |             |            |     | 1.33 ± .53  | 1.14 ± .55 | .57 |
| Glutamine                                                         | 1.04 ± .07  | .93 ± .10  | .06 | .98 ± .19   | 1.05 ± .11 | .51 |
| <b><i>Amino acid_Glutathione metabolism</i></b>                   |             |            |     |             |            |     |
| Cysteine-glutathione disulfide                                    |             |            |     | 1.55 ± .91  | .74 ± .39  | .07 |
| Glutathione, oxidized (GSSG)                                      | 3.92 ± 3.61 | .67 ± .48  | .05 | 5.47 ± 6.43 | .69 ± .43  | .10 |
| Glutathione, reduced (GSH)                                        |             |            |     | 1.44 ± .90  | .70 ± .24  | .08 |
| <i>S</i> -Methylglutathione                                       | 1.59 ± .81  | .84 ± .44  | .08 |             |            |     |
| Ophthalmate                                                       | 1.31 ± .53  | .97 ± .37  | .24 |             |            |     |
| 5-Oxoproline                                                      | 1.03 ± .14  | .95 ± .10  | .29 | .84 ± .26   | 1.07 ± .28 | .18 |
| <b><i>Amino acid_Glycine, serine and threonine metabolism</i></b> |             |            |     |             |            |     |
| <i>N</i> -Acetylglycine                                           | .98 ± .29   | 1.06 ± .30 | .65 | 1.00 ± .25  | 1.04 ± .18 | .76 |
| <i>N</i> -Acetylserine                                            | 1.19 ± .31  | .96 ± .17  | .15 | 1.22 ± .64  | .95 ± .17  | .35 |
| <i>N</i> -Acetylthreonine                                         |             |            |     | 1.02 ± .18  | .92 ± .28  | .53 |
| Betaine                                                           | .94 ± .17   | .96 ± .20  | .83 | .97 ± .25   | .98 ± .17  | .97 |
| Dimethylglycine                                                   | 1.16 ± .31  | .82 ± .25  | .07 |             |            |     |
| Glycine                                                           | 1.06 ± .17  | 1.02 ± .13 | .62 | .95 ± .20   | 1.03 ± .28 | .58 |
| Homoserine                                                        | 1.58 ± .69  | .71 ± .24  | .01 | 1.03 ± .25  | .92 ± .31  | .51 |

|                                                                  |             |            |     |             |            |     |
|------------------------------------------------------------------|-------------|------------|-----|-------------|------------|-----|
| beta-Hydroxypyruvate                                             | 1.17 ± .18  | .88 ± .12  | .01 | .73 ± .11   | .80 ± .15  | .34 |
| Serine                                                           | 1.12 ± .27  | .94 ± .17  | .21 | .95 ± .18   | .93 ± .22  | .87 |
| Threonine                                                        | 1.11 ± .38  | .94 ± .15  | .34 | 1.02 ± .11  | 1.01 ± .13 | .96 |
| <b><i>Amino acid_Guanidino and acetamido metabolism</i></b>      |             |            |     |             |            |     |
| 4-Acetamidobutanoate                                             | .98 ± .22   | 1.01 ± .17 | .82 |             |            |     |
| <b><i>Amino acid_Histidine metabolism</i></b>                    |             |            |     |             |            |     |
| 3-Methylhistidine                                                | 1.14 ± .31  | 1.02 ± .12 | .39 |             |            |     |
| 1-Methylimidazoleacetate                                         | 1.07 ± .26  | 1.12 ± .22 | .71 |             |            |     |
| Histamine                                                        |             |            |     | .72 ± .54   | 1.45 ± .96 | .14 |
| Histidine                                                        | 1.10 ± .18  | .97 ± .17  | .23 | 1.03 ± .20  | 1.01 ± .24 | .85 |
| Imidazole propionate                                             | 1.26 ± .34  | .95 ± .26  | .12 |             |            |     |
| <i>cis</i> -Urocanate                                            | 1.11 ± .25  | .95 ± .21  | .28 |             |            |     |
| <i>trans</i> -Urocanate                                          | 1.20 ± .24  | .90 ± .26  | .06 |             |            |     |
| <b><i>Amino acid_Lysine metabolism</i></b>                       |             |            |     |             |            |     |
| N6-Acetyllysine                                                  | 1.06 ± .12  | .92 ± .11  | .06 |             |            |     |
| 2-Amino adipate                                                  |             |            |     | 1.07 ± .28  | .89 ± .27  | .28 |
| Glutarate (pentanedioate)                                        | 2.02 ± 1.50 | .82 ± .43  | .09 | .92 ± .21   | 1.74 ± .92 | .06 |
| Glutaroyl carnitine                                              | 1.37 ± .36  | .90 ± .12  | .01 |             |            |     |
| Lysine                                                           | 1.22 ± .45  | .86 ± .29  | .13 | .98 ± .18   | .92 ± .18  | .58 |
| Pipecolate                                                       | 1.00 ± .20  | 1.17 ± .22 | .21 | 1.10 ± .46  | 1.13 ± .40 | .91 |
| <b><i>Amino acid_Phenylalanine &amp; tyrosine metabolism</i></b> |             |            |     |             |            |     |
| N-Acetylphenylalanine                                            | 1.31 ± .32  | .93 ± .08  | .02 |             |            |     |
| N-Acetyltyrosine                                                 | 1.18 ± .29  | .79 ± .27  | .04 |             |            |     |
| <i>p</i> -Cresol sulfate                                         | 1.19 ± .39  | .81 ± .42  | .14 | 1.25 ± .41  | .65 ± .40  | .03 |
| Epinephrine                                                      | 2.15 ± 1.50 | .68 ± .26  | .04 |             |            |     |
| 4-Hydroxyphenylacetate                                           | 1.11 ± .36  | .93 ± .20  | .32 |             |            |     |
| 3-(4-Hydroxyphenyl)lactate                                       | 1.17 ± .24  | .81 ± .21  | .02 | 1.93 ± 1.04 | .90 ± .59  | .06 |
| 4-Hydroxyphenylpyruvate                                          | 1.94 ± 1.03 | .75 ± .28  | .02 |             |            |     |
| Phenol sulfate                                                   | .91 ± .28   | .90 ± .31  | .96 | 1.35 ± .70  | 1.14 ± .53 | .58 |
| Phenylacetyl glycine                                             | 1.06 ± .18  | .96 ± .30  | .51 | 1.11 ± .24  | .99 ± .27  | .42 |
| Phenylalanine                                                    | 1.20 ± .14  | 1.00 ± .09 | .01 | .98 ± .12   | .94 ± .18  | .66 |
| Phenyllactate (PLA)                                              | 1.09 ± .25  | .73 ± .19  | .02 | .86 ± .40   | .64 ± .00  |     |
| 3-Phenylpropionate (hydrocinnamate)                              | .95 ± .17   | 1.07 ± .39 | .53 |             |            |     |

|                                                                      |             |            |     |             |             |     |
|----------------------------------------------------------------------|-------------|------------|-----|-------------|-------------|-----|
| Phenylpyruvate                                                       | 1.20 ± .45  | .87 ± .31  | .17 |             |             |     |
| Tyrosine                                                             | 1.23 ± .30  | .92 ± .13  | .04 | 1.00 ± .14  | .90 ± .19   | .32 |
| <b><i>Amino acid_Polyamine metabolism</i></b>                        |             |            |     |             |             |     |
| 5-Methylthioadenosine (MTA)                                          | 1.27 ± .46  | .70 ± .35  | .04 | 1.20 ± .23  | .90 ± .29   | .08 |
| Putrescine                                                           |             |            |     | 1.28 ± .35  | .97 ± .62   | .33 |
| Spermidine                                                           |             |            |     | 1.13 ± .16  | .91 ± .29   | .15 |
| <b><i>Amino acid_Tryptophan metabolism</i></b>                       |             |            |     |             |             |     |
| N-Acetyltryptophan                                                   | .97 ± .13   | 1.13 ± .21 | .15 |             |             |     |
| C-Glycosyltryptophan                                                 | 1.23 ± .27  | .92 ± .09  | .02 | 1.18 ± .34  | .85 ± .18   | .07 |
| Indoleacetate                                                        | 1.04 ± .36  | .97 ± .17  | .69 |             |             |     |
| Indolelactate                                                        | 1.55 ± .45  | .90 ± .16  | .01 | 4.14 ± 4.75 | 1.12 ± 1.12 | .17 |
| Indolepropionate                                                     | .88 ± .22   | 1.03 ± .37 | .43 |             |             |     |
| 3-Indoxyl sulfate                                                    | .99 ± .18   | 1.01 ± .12 | .79 | 1.33 ± .47  | .79 ± .31   | .04 |
| Kynurenate                                                           | 1.11 ± .42  | .99 ± .41  | .63 |             |             |     |
| Kynurenine                                                           | 1.12 ± .21  | 1.15 ± .45 | .88 | 1.17 ± .36  | .99 ± .31   | .39 |
| Serotonin (5HT)                                                      | 2.23 ± 1.24 | .78 ± .29  | .02 |             |             |     |
| Tryptophan                                                           | 1.02 ± .16  | .92 ± .13  | .28 | .99 ± .20   | .89 ± .21   | .44 |
| <b><i>Amino acid_Urea cycle; arginine-, proline-, metabolism</i></b> |             |            |     |             |             |     |
| 5-Aminovalerate                                                      |             |            |     | .87 ± .26   | 1.33 ± .52  | .09 |
| Arginine                                                             | 1.20 ± .18  | .93 ± .15  | .02 | 1.02 ± .32  | .88 ± .32   | .49 |
| Assymetric dimethylarginine (ADMA)                                   | 1.06 ± .21  | .87 ± .13  | .09 | .94 ± .19   | 1.03 ± .24  | .53 |
| Citrulline                                                           | .96 ± .07   | 1.10 ± .10 | .02 | .92 ± .18   | 1.08 ± .27  | .27 |
| Homocitrulline                                                       | 1.00 ± .26  | .94 ± .16  | .63 |             |             |     |
| <i>trans</i> -4-Hydroxyproline                                       | .91 ± .21   | .97 ± .25  | .68 | 1.02 ± .29  | .94 ± .17   | .58 |
| Ornithine                                                            | 2.48 ± 2.07 | .73 ± .71  | .08 | .90 ± .25   | .96 ± .21   | .65 |
| Proline                                                              | 1.54 ± .55  | .92 ± .27  | .03 | 1.05 ± .21  | 1.02 ± .21  | .83 |
| Urea                                                                 | 1.12 ± .21  | .99 ± .17  | .25 | 1.13 ± .35  | .87 ± .26   | .18 |
| <b><i>Amino acid_Valine, leucine and isoleucine metabolism</i></b>   |             |            |     |             |             |     |
| N-Acetylisoleucine                                                   | .91 ± .24   | 1.11 ± .37 | .29 |             |             |     |
| N-Acetylleucine                                                      | 1.04 ± .23  | .83 ± .26  | .17 |             |             |     |
| N-Acetylvaline                                                       |             |            |     | .80 ± .18   | .72 ± .16   | .46 |
| 2-Hydroxyisobutyrate                                                 | .94 ± .20   | 1.10 ± .18 | .18 |             |             |     |
| 3-Hydroxyisobutyrate                                                 | 1.34 ± .44  | .99 ± .32  | .15 |             |             |     |

|                                                   |            |             |       |             |             |     |
|---------------------------------------------------|------------|-------------|-------|-------------|-------------|-----|
| alpha-Hydroxyisovalerate                          | 1.68 ± .64 | .97 ± .45   | .0483 | 1.47 ± .60  | .69 ± .31   | .02 |
| beta-Hydroxyisovalerate                           | .94 ± .14  | 1.11 ± .29  | .22   |             |             |     |
| Hydroxyisovaleroyl carnitine                      | .70 ± .31  | 1.31 ± .65  | .06   | .88 ± .67   | .99 ± .36   | .74 |
| Isobutyrylcarnitine                               | 1.37 ± .49 | .95 ± .22   | .08   | 1.79 ± 1.07 | .75 ± .41   | .05 |
| Isoleucine                                        | 1.04 ± .15 | .96 ± .12   | .33   | .98 ± .16   | .98 ± .16   | .98 |
| Isovalerylcarnitine                               | 1.51 ± .71 | 1.24 ± 1.11 | .64   | 2.69 ± 2.27 | 1.01 ± .74  | .12 |
| Isovalerylglycine                                 | 1.19 ± .39 | 1.10 ± .58  | .77   |             |             |     |
| Leucine                                           | 1.09 ± .20 | .94 ± .11   | .14   | .98 ± .12   | .96 ± .18   | .84 |
| Levulinate (4-oxovalerate)                        | .95 ± .21  | 1.10 ± .23  | .27   |             |             |     |
| 2-Methylbutyrylcarnitine                          | 1.33 ± .56 | .89 ± .28   | .12   | 1.97 ± 1.44 | .75 ± .31   | .07 |
| Methylglutaroylcarnitine                          | 1.27 ± .39 | .90 ± .32   | .12   |             |             |     |
| 3-Methyl-2-oxobutyrate                            | 1.13 ± .33 | 1.04 ± .11  | .53   |             |             |     |
| 4-Methyl-2-oxopentanoate                          | 1.14 ± .38 | 1.02 ± .14  | .48   | 1.73 ± 1.40 | 2.24 ± 2.34 | .67 |
| 3-Methyl-2-oxovalerate                            | 1.16 ± .40 | 1.02 ± .06  | .45   | .77 ± .43   | 1.10 ± .77  | .38 |
| Valine                                            | 1.11 ± .21 | .98 ± .16   | .26   | 1.01 ± .14  | .93 ± .16   | .40 |
| <b><i>Peptide_Dipeptide</i></b>                   |            |             |       |             |             |     |
| Alanylalanine                                     | .92 ± .13  | 1.08 ± .28  | .24   | 1.19 ± .32  | 1.00 ± .29  | .31 |
| Aspartylleucine                                   |            |             |       | .92 ± .31   | 1.24 ± .41  | .17 |
| Aspartylphenylalanine                             |            |             |       | .98 ± .19   | .99 ± .27   | .94 |
| Glycylglycine                                     |            |             |       | 1.15 ± .39  | .93 ± .25   | .28 |
| Glycylleucine                                     |            |             |       | 1.24 ± .38  | 1.19 ± .54  | .88 |
| Glycylphenylalanine                               |            |             |       | 1.08 ± .25  | 1.01 ± .36  | .71 |
| Glycylproline                                     |            |             |       | 1.04 ± .19  | .93 ± .19   | .37 |
| Isoleucylglutamate                                |            |             |       | .72 ± .25   | .98 ± .39   | .20 |
| Isoleucylglycine                                  |            |             |       | 1.11 ± .23  | 1.09 ± .50  | .95 |
| Prolylalanine                                     |            |             |       | 1.67 ± 1.46 | .87 ± .39   | .23 |
| Pro-hydroxy-pro                                   | 1.01 ± .30 | .99 ± .21   | .93   | 1.26 ± .45  | .98 ± .23   | .21 |
| Serylleucine                                      |            |             |       | .93 ± .17   | 1.15 ± .20  | .06 |
| <b><i>Peptide_Dipeptide derivative</i></b>        |            |             |       |             |             |     |
| Anserine                                          | 1.33 ± .50 | 1.03 ± .34  | .26   | 1.42 ± 1.09 | 1.99 ± 1.20 | .42 |
| Carnosine                                         |            |             |       | 1.14 ± .41  | .93 ± .30   | .34 |
| <b><i>Peptide_Fibrinogen cleavage peptide</i></b> |            |             |       |             |             |     |
| SPVPDXVPGSFK                                      | .99 ± .41  | 1.61 ± 1.02 | .20   |             |             |     |

|                                                                             |             |            |     |            |             |     |
|-----------------------------------------------------------------------------|-------------|------------|-----|------------|-------------|-----|
| TDTEDKGEFLSEGGGV                                                            | 1.78 ± 1.72 | 1.06 ± .81 | .38 |            |             |     |
| TDTEDKGEFLSEGGGVR                                                           | 1.90 ± 1.41 | .75 ± .59  | .10 |            |             |     |
| <b><i>Peptide_gamma-Glutamyl</i></b>                                        |             |            |     |            |             |     |
| gamma-Glutamylalanine                                                       | 1.22 ± .38  | .84 ± .20  | .06 | .97 ± .28  | .98 ± .23   | .92 |
| gamma-Glutamylcysteine                                                      |             |            |     | 1.11 ± .52 | 1.27 ± .60  | .65 |
| gamma-Glutamylglutamate                                                     |             |            |     | 1.05 ± .54 | .94 ± .35   | .69 |
| gamma-Glutamylglutamine                                                     | 1.10 ± .21  | 1.04 ± .24 | .64 | .89 ± .36  | 1.07 ± .28  | .37 |
| gamma-Glutamylglycine                                                       |             |            |     | .82 ± .30  | 1.07 ± .30  | .20 |
| gamma-Glutamylisoleucine                                                    | 1.12 ± .26  | .91 ± .16  | .12 | .96 ± .23  | 1.14 ± .33  | .32 |
| gamma-Glutamylleucine                                                       | 1.15 ± .34  | .88 ± .16  | .11 | .89 ± .27  | 1.04 ± .28  | .37 |
| gamma-Glutamylmethionine                                                    | 1.22 ± .63  | .96 ± .40  | .41 | .96 ± .28  | .98 ± .21   | .90 |
| gamma-Glutamylphenylalanine                                                 | 1.32 ± .38  | .89 ± .14  | .03 | .90 ± .25  | 1.12 ± .32  | .22 |
| gamma-Glutamylthreonine                                                     | 1.34 ± .42  | 1.02 ± .26 | .15 | .95 ± .34  | 1.09 ± .27  | .48 |
| gamma-Glutamyltryptophan                                                    | .95 ± .24   | .89 ± .23  | .68 | 1.02 ± .27 | 1.08 ± .28  | .69 |
| gamma-Glutamyltyrosine                                                      | 1.34 ± .48  | .89 ± .25  | .07 | .98 ± .30  | 1.09 ± .31  | .55 |
| gamma-Glutamylvaline                                                        | 1.22 ± .37  | .96 ± .24  | .19 | .98 ± .34  | 1.01 ± .29  | .88 |
| <b><i>Cofactors and vitamins_Ascorbate and aldarate metabolism</i></b>      |             |            |     |            |             |     |
| Ascorbate (Vitamin C)                                                       |             |            |     | 1.18 ± .56 | .90 ± .37   | .34 |
| Dehydroascorbate                                                            |             |            |     | 1.11 ± .30 | .96 ± .40   | .50 |
| Gulono-1,4-lactone                                                          | 1.35 ± .44  | .87 ± .23  | .04 |            |             |     |
| Threonate                                                                   | 1.07 ± .21  | 1.01 ± .17 | .66 |            |             |     |
| <b><i>Cofactors and vitamins_Folate metabolism</i></b>                      |             |            |     |            |             |     |
| Dihydrobiopterin                                                            | 1.35 ± .43  | .85 ± .18  | .02 |            |             |     |
| 5-Methyltetrahydrofolate (5MeTHF)                                           |             |            |     | .82 ± .40  | 1.10 ± .33  | .22 |
| <b><i>Cofactors and vitamins_Hemoglobin and porphyrin metabolism</i></b>    |             |            |     |            |             |     |
| Bilirubin (E,E)                                                             | 1.51 ± .94  | .87 ± .17  | .13 |            |             |     |
| Biliverdin                                                                  | 1.09 ± .46  | .89 ± .35  | .43 | 1.39 ± .50 | .65 ± .39   | .02 |
| Heme                                                                        | 1.03 ± .35  | 1.15 ± .51 | .66 | 1.26 ± .75 | .43 ± .36   | .03 |
| <b><i>Cofactors and vitamins_Nicotinate and nicotinamide metabolism</i></b> |             |            |     |            |             |     |
| Nicotinamide                                                                | .99 ± .10   | .91 ± .30  | .52 | 1.02 ± .19 | 1.00 ± .16  | .89 |
| Nicotinamide adenine dinucleotide (NAD+)                                    |             |            |     | 1.03 ± .23 | .90 ± .25   | .38 |
| Nicotinamide riboside                                                       |             |            |     | .86 ± .44  | 1.52 ± 1.10 | .21 |
| <b><i>Cofactors and vitamins_Pantothenate and CoA metabolism</i></b>        |             |            |     |            |             |     |

|                                                            |             |             |       |             |             |     |
|------------------------------------------------------------|-------------|-------------|-------|-------------|-------------|-----|
| Pantothenate                                               | 1.07 ± .20  | .94 ± .13   | .21   | 1.09 ± .72  | 1.07 ± .27  | .96 |
| <b><i>Cofactors and vitamins_Pyridoxal metabolism</i></b>  |             |             |       |             |             |     |
| Pyridoxal                                                  | 1.20 ± .27  | .81 ± .18   | .01   | .89 ± .20   | .93 ± .24   | .79 |
| <b><i>Cofactors and vitamins_Riboflavin metabolism</i></b> |             |             |       |             |             |     |
| Flavin adenine dinucleotide (FAD)                          |             |             |       | 1.02 ± .28  | 1.00 ± .34  | .89 |
| Flavin mononucleotide (FMN)                                |             |             |       | 1.09 ± .49  | 1.04 ± .42  | .86 |
| Riboflavin (Vitamin B2)                                    |             |             |       | 1.12 ± .22  | 1.09 ± .22  | .80 |
| <b><i>Cofactors and vitamins_Tocopherol metabolism</i></b> |             |             |       |             |             |     |
| alpha-Tocopherol                                           | 1.02 ± .17  | .98 ± .14   | .70   | 1.19 ± .51  | .88 ± .37   | .27 |
| <b><i>Cofactors and vitamins_Vitamin B6 metabolism</i></b> |             |             |       |             |             |     |
| Pyridoxate                                                 | 1.25 ± .32  | .96 ± .14   | .07   |             |             |     |
| <b><i>Xenobiotics_Benzoate metabolism</i></b>              |             |             |       |             |             |     |
| Benzoate                                                   | .63 ± .24   | 1.87 ± .78  | .003  | 1.07 ± .09  | .97 ± .35   | .53 |
| Catechol sulfate                                           | 1.10 ± .30  | 1.08 ± .44  | .93   | .95 ± .42   | .82 ± .32   | .57 |
| Hippurate                                                  | .98 ± .16   | 1.00 ± .33  | .90   | 1.02 ± .29  | 1.08 ± .44  | .82 |
| 4-Hydroxyhippurate                                         | 1.02 ± .16  | 1.10 ± .36  | .67   |             |             |     |
| Methyl-4-hydroxybenzoate                                   | .80 ± .17   | 1.23 ± .25  | .004  |             |             |     |
| <b><i>Xenobiotics_Chemical</i></b>                         |             |             |       |             |             |     |
| Dexpanthenol                                               |             |             |       | 1.00 ± 0.00 | 1.00 ± 0.00 |     |
| 2-Ethylhexanoate                                           | .72 ± .18   | 1.65 ± .55  | .002  |             |             |     |
| 2-Ethylhexanoate<br>(isobar with 2-propylpentanoate)       |             |             |       | 1.04 ± .12  | 1.08 ± .26  | .73 |
| Glycerol 2-phosphate                                       | 1.06 ± .14  | .89 ± .15   | .07   | .91 ± .38   | 1.01 ± .29  | .64 |
| Glycolate (hydroxyacetate)                                 | 1.41 ± .89  | 1.25 ± .69  | .74   | 1.98 ± 1.88 | 3.78 ± 4.30 | .38 |
| Oxamate                                                    |             |             |       | 1.10 ± .29  | 1.17 ± .31  | .68 |
| Trizma acetate                                             | 2.51 ± 2.90 | 2.13 ± 2.17 | .81   | 1.22 ± .96  | 1.42 ± 2.56 | .87 |
| <b><i>Xenobiotics_Drug</i></b>                             |             |             |       |             |             |     |
| Penicillin G                                               |             |             |       | .79 ± .62   | .52 ± .34   | .39 |
| <b><i>Xenobiotics_Food component/Plant</i></b>             |             |             |       |             |             |     |
| N-Glycolylneuraminate                                      |             |             |       | 1.23 ± .56  | .88 ± .23   | .19 |
| 5-Hydroxymethylfurfural                                    |             |             |       | 1.02 ± .25  | 1.23 ± .52  | .39 |
| Stachydrine                                                | 1.02 ± .32  | 1.76 ± 1.47 | .27   | .83 ± .37   | 1.29 ± 1.08 | .36 |
| Tartarate                                                  | 3.09 ± 2.08 | 1.11 ± .67  | .0496 |             |             |     |

|                                                           |            |            |     |            |            |     |
|-----------------------------------------------------------|------------|------------|-----|------------|------------|-----|
| Vanillin                                                  | .83 ± .16  | 1.09 ± .18 | .02 |            |            |     |
| <b><i>Xenobiotics_Sugar, sugar substitute, starch</i></b> |            |            |     |            |            |     |
| Erythritol                                                | 1.23 ± .31 | .95 ± .25  | .11 | 1.46 ± .84 | 1.01 ± .35 | .26 |

\* Plasma and tumor specimens were used from MMTV-*neu* mice administered control or WA (n = 8 mice per group).

† All *P* values were calculated by a two-sided Student's *t* test.
